# Supplementary material for: Exploring the Genetic Landscape of Retinal Diseases in North-Western Pakistan Reveals a High Degree of Autozygosity and a Prevalent Founder Mutation in ABCA4
Source: PubMed Central journal article supplement (PMC7017091; doi:10.3390/genes11010012), 2019-12-21

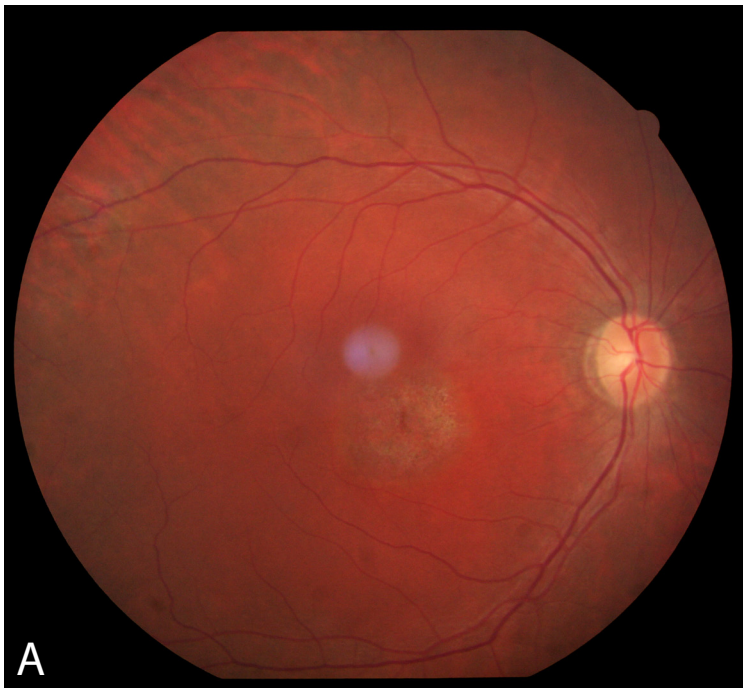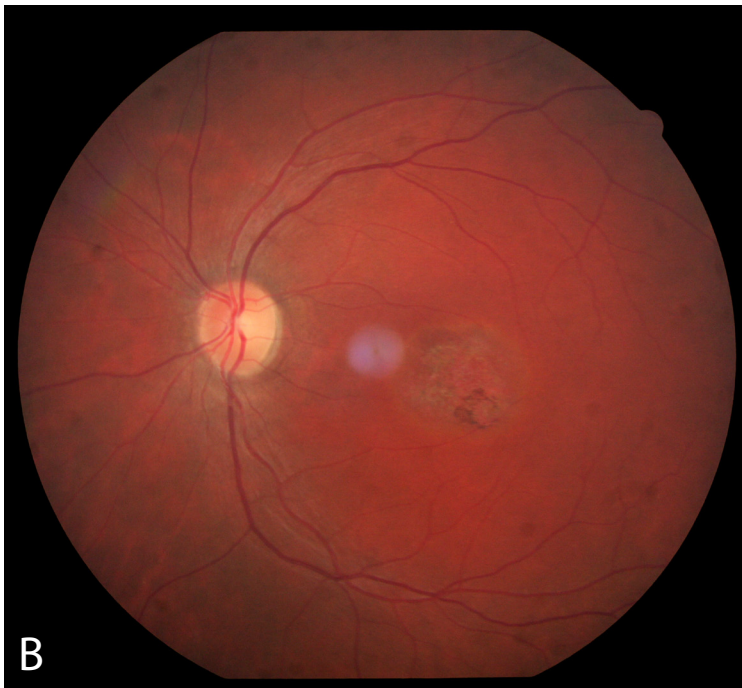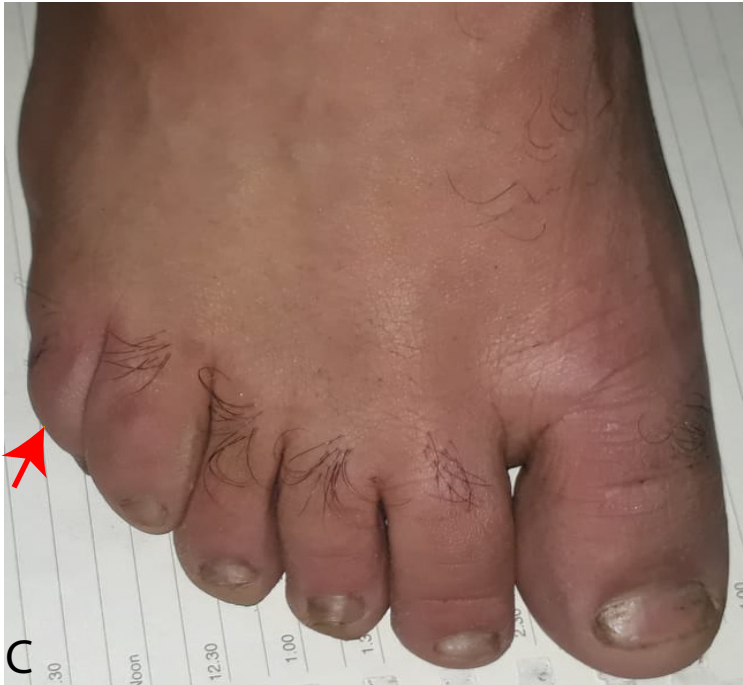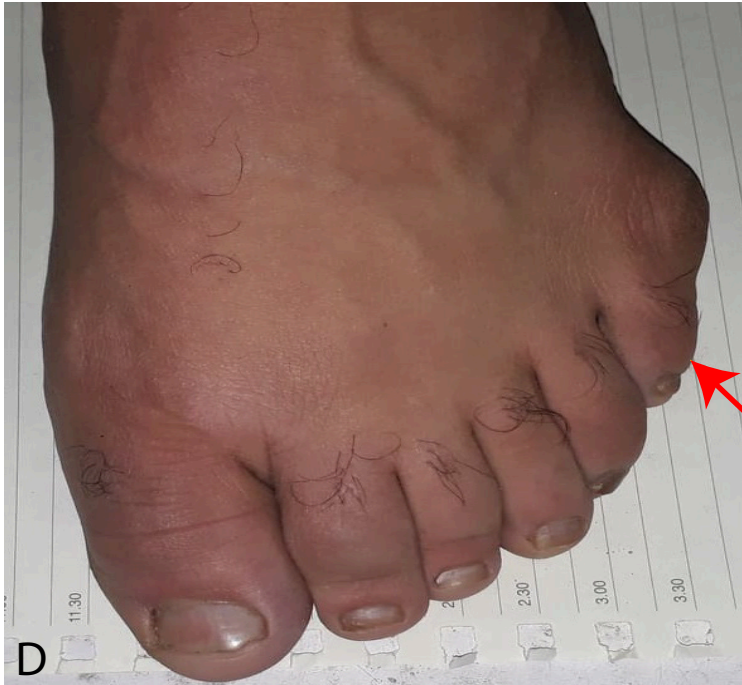

Supplement: genes-11-00012-s001.pdf [file genes-11-00012-s001.pdf]
